# Supplementary material for: PepT1 Expression Helps Maintain Intestinal Homeostasis by Mediating the Differential Expression of miRNAs along the Crypt-Villus Axis
Source: PubMed Central journal article supplement (PMC4890533; doi:10.1038/srep27119), 2016-06-01
Supplement: srep27119-s1.pdf [file srep27119-s1.pdf]

**PepT1 Expression Helps Maintain Intestinal Homeostasis by Mediating the Differential  
Expression of miRNAs along the Crypt-Villus Axis**

Yuchen Zhang<sup>1,\*</sup>, Emilie Viennois<sup>1</sup>, Mingzhen Zhang<sup>1</sup>, Bo Xiao<sup>1, 3</sup>, Moon Kwon Han<sup>1</sup>,  
Lewins Walter<sup>1</sup>, Pallavi Garg<sup>4</sup>, Didier Merlin<sup>1,2</sup>

<sup>1</sup>Center for Diagnostics and Therapeutics, Institute for Biomedical Sciences, Georgia State University, Atlanta, Georgia, 30302, USA

<sup>2</sup>Atlanta Veterans Affairs Medical Center, Decatur, Georgia, 30033, USA

<sup>3</sup>Institute for Clean Energy and Advanced Materials, Faculty for Materials and Energy, Southwest University, Chongqing, 400715, P. R. China

<sup>4</sup>Department of Biology, Georgia State University, Atlanta, Georgia, 30302, USA

**\*Corresponding author:** Yuchen Zhang, Institute for Biomedical Sciences, Georgia State University, Atlanta, GA, Tel.: +1 (404) 413 5590; Fax: +1 (404) 413 3580; Email: yzhang42@gsu.edu

**Supplementary Figure 1. Expression of PepT1 and Lgr5 in isolated epithelial cells of the jejunum from BL-6 WT mice.** Total RNAs were extracted from the different fractions collected from BL-6 WT mice using the low-temperature method, and the expression levels of PepT1 (as a villus marker) and Lgr5 (as a crypt marker) were assessed by qRT-PCR.

**Supplementary Figure 2. Expression of Muc2, Lgr5, and mPepT1 in WT and KO mice.** The expression levels of (a) Muc2, (b) Lgr5, and (c) mPepT1 were assessed by immunofluorescence. Muc2, Lgr5 and mPepT1 were immunostained using anti-Muc2, anti-Lgr5, and anti-PepT1, respectively (FITC, green). F-actin was stained using phalloidin (TRITC, red), and cell nuclei were stained using DAPI (blue). Separate pictures were taken at 20× for each filter, and the images were merged. Scale bar, 50 μm.

**Supplementary Figure 3. Clustering graph of selected miRNAs.** MicroRNA microarray results demonstrated that different miRNA profiles were observed in crypts and villi of WT and PepT1 KO mice. We selected miRNAs that exhibited *P* value <0.05 and signal strengths > 500.

**Supplementary Figure 4. Expression levels of selected miRNAs in crypt and villus epithelial cells from BL-6 WT and PepT1 KO mice.** The expression levels of 36 selected miRNAs were verified by qRT-PCR (n= 5/group; \* *P*< 0.05, \*\* *P*< 0.005, and \*\*\* *P*< 0.001).

**Supplementary Figure 5. PepT1 expression disturbs normal differential protein expression along the crypt-villus axis.** 2D-DIGE DeCyder BVA (Biological Variation Analysis) showing a representative gel image with labeled sample of difference. Changes in

protein expression were compared between villi and crypts, with a pooled internal standard included. The master gel image shows the locations of the differentially expressed proteins in each comparison. *a.* 43 spots with > 2.0-fold differences in WT villi vs. WT crypts. *b.* 72 spots with > 2.0-fold differences in KO villi vs. KO crypts.

**Supplementary Figure 6. PepT1 expression altered the normal protein profile in villus and crypt, respectively.** 2D-DIGE DeCyder BVA (Biological Variation Analysis) showing a representative gel image with labeled sample of difference. Changes in protein expression were compared between BL-6 WT and PePT1 KO mice, with a pooled internal standard included. The master gel image shows the locations of the differentially expressed proteins in each comparison. *a.* 24 spots with > 2.0-fold differences in WT villi vs. KO villi. *b.* 5 spots with > 2.0-fold differences in WT crypts vs. KO crypts.

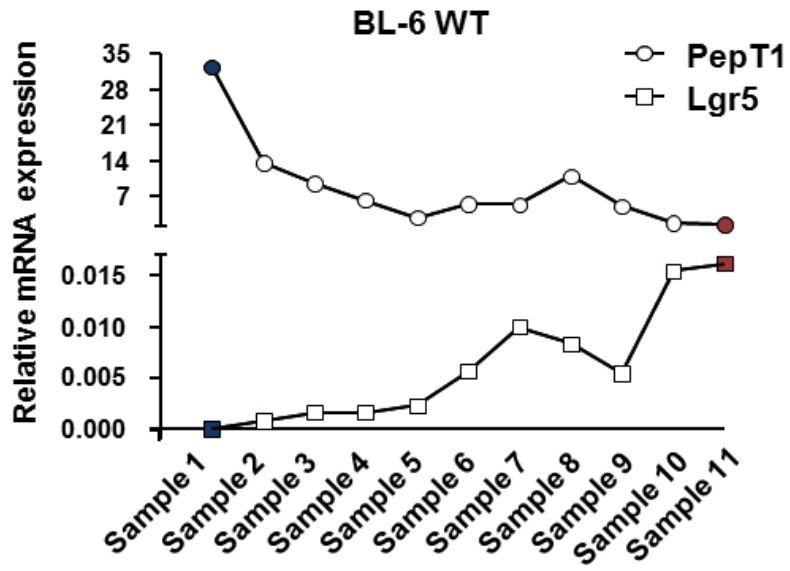

Supplementary Figure 1

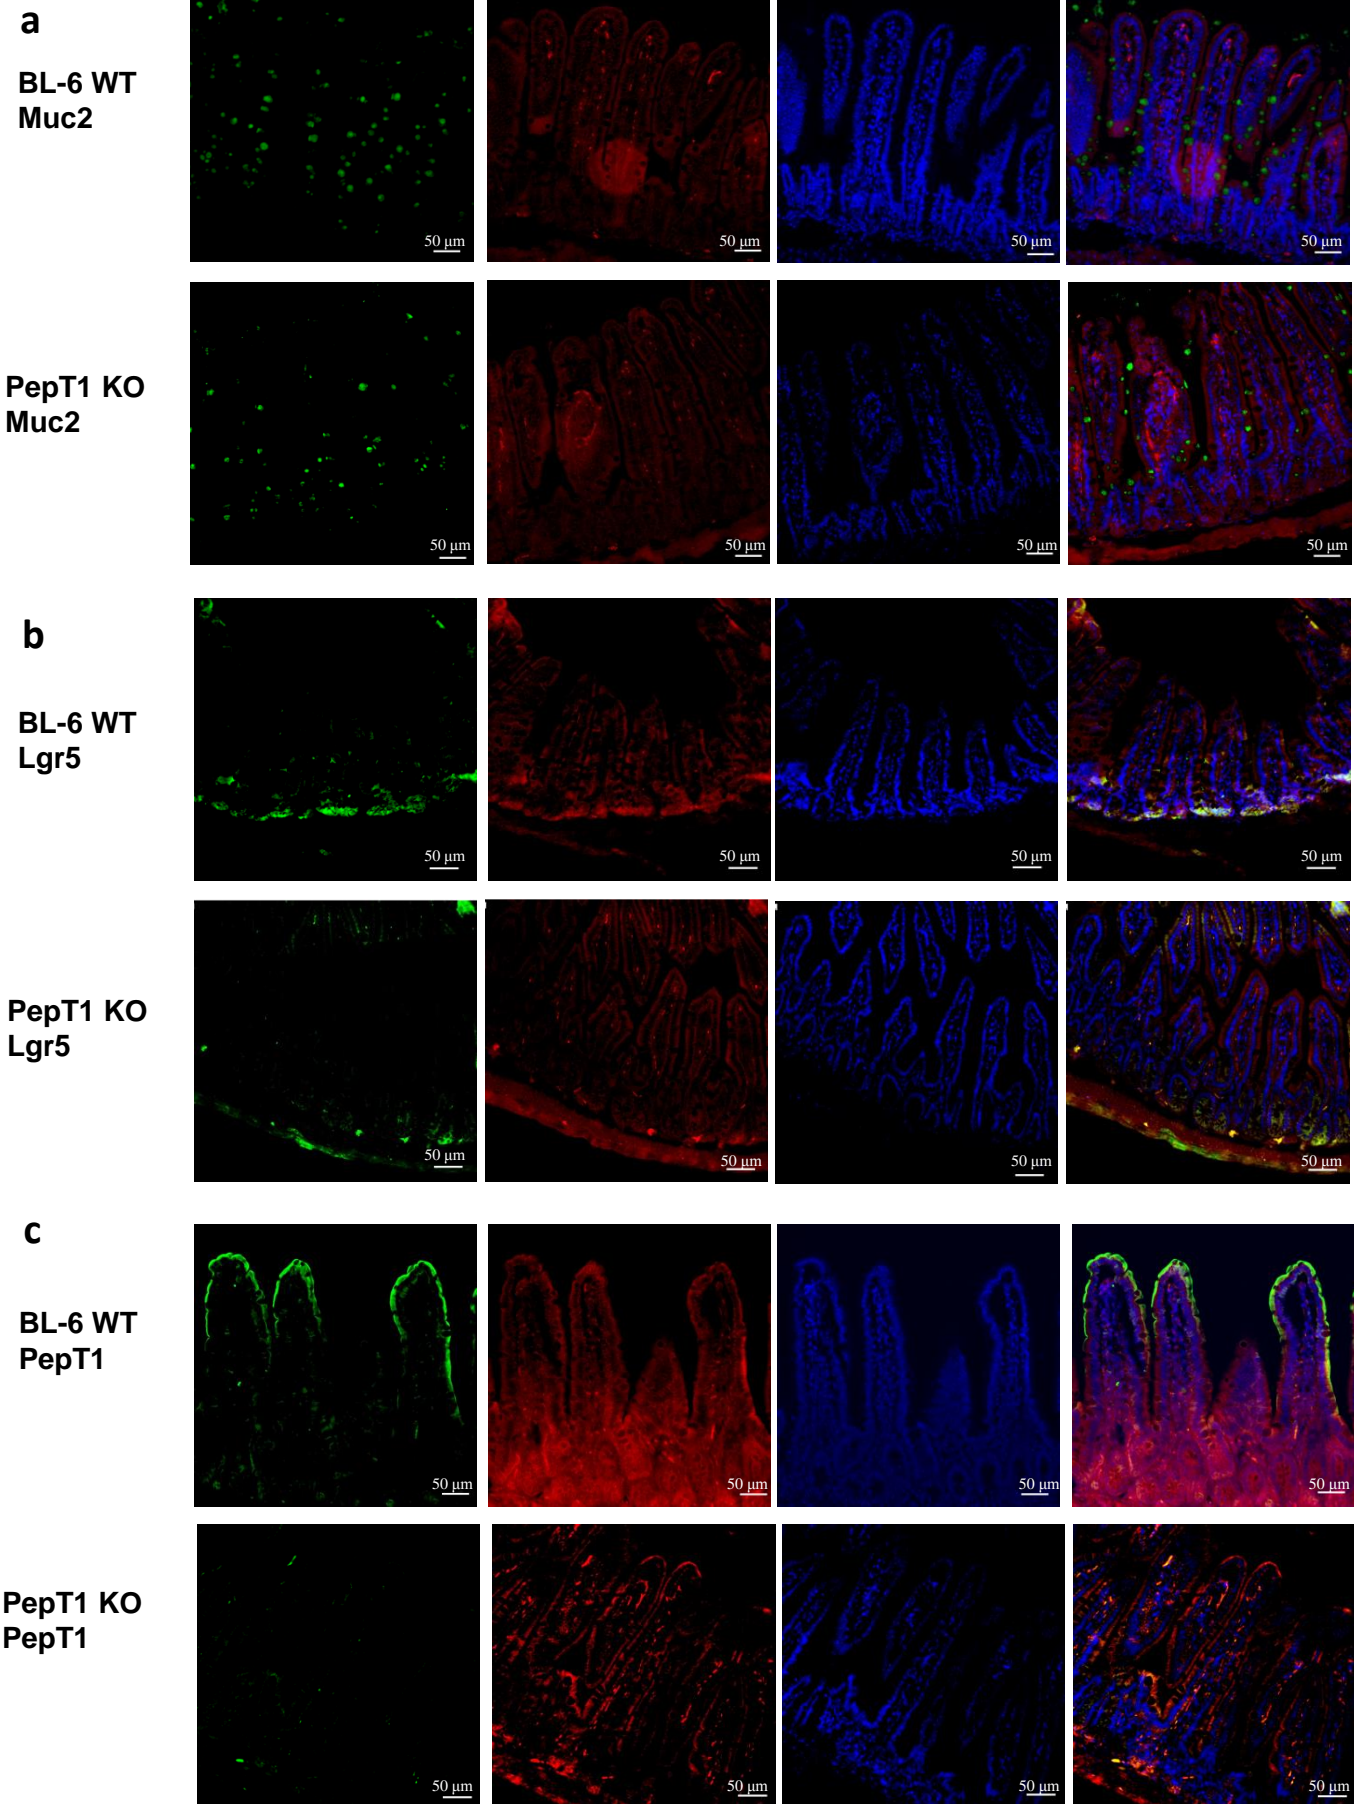

Supplementary Figure 2

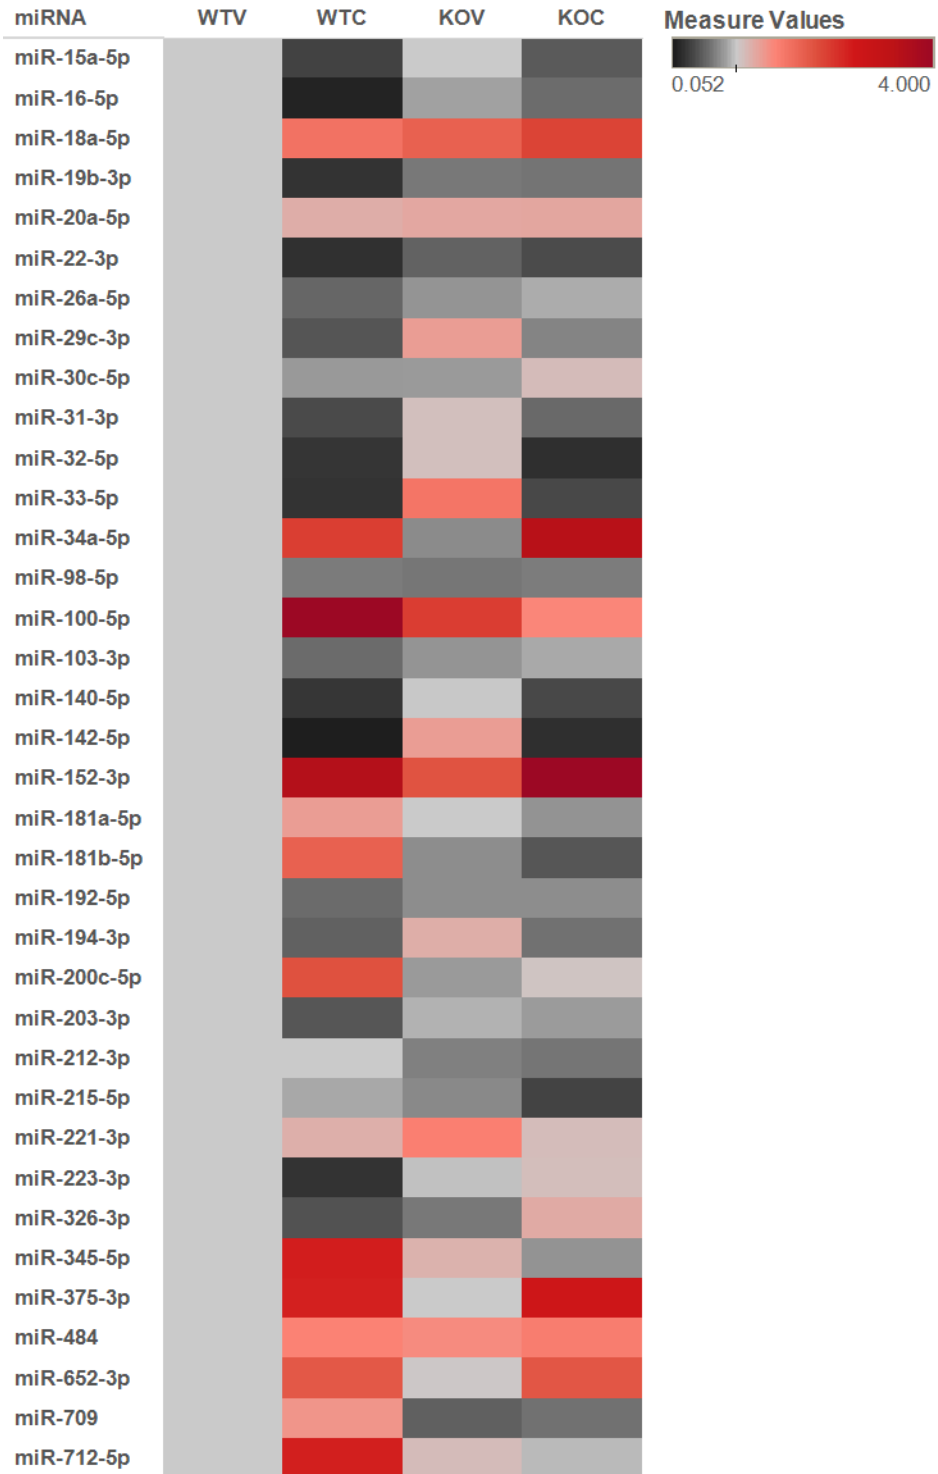

Supplementary Figure 3

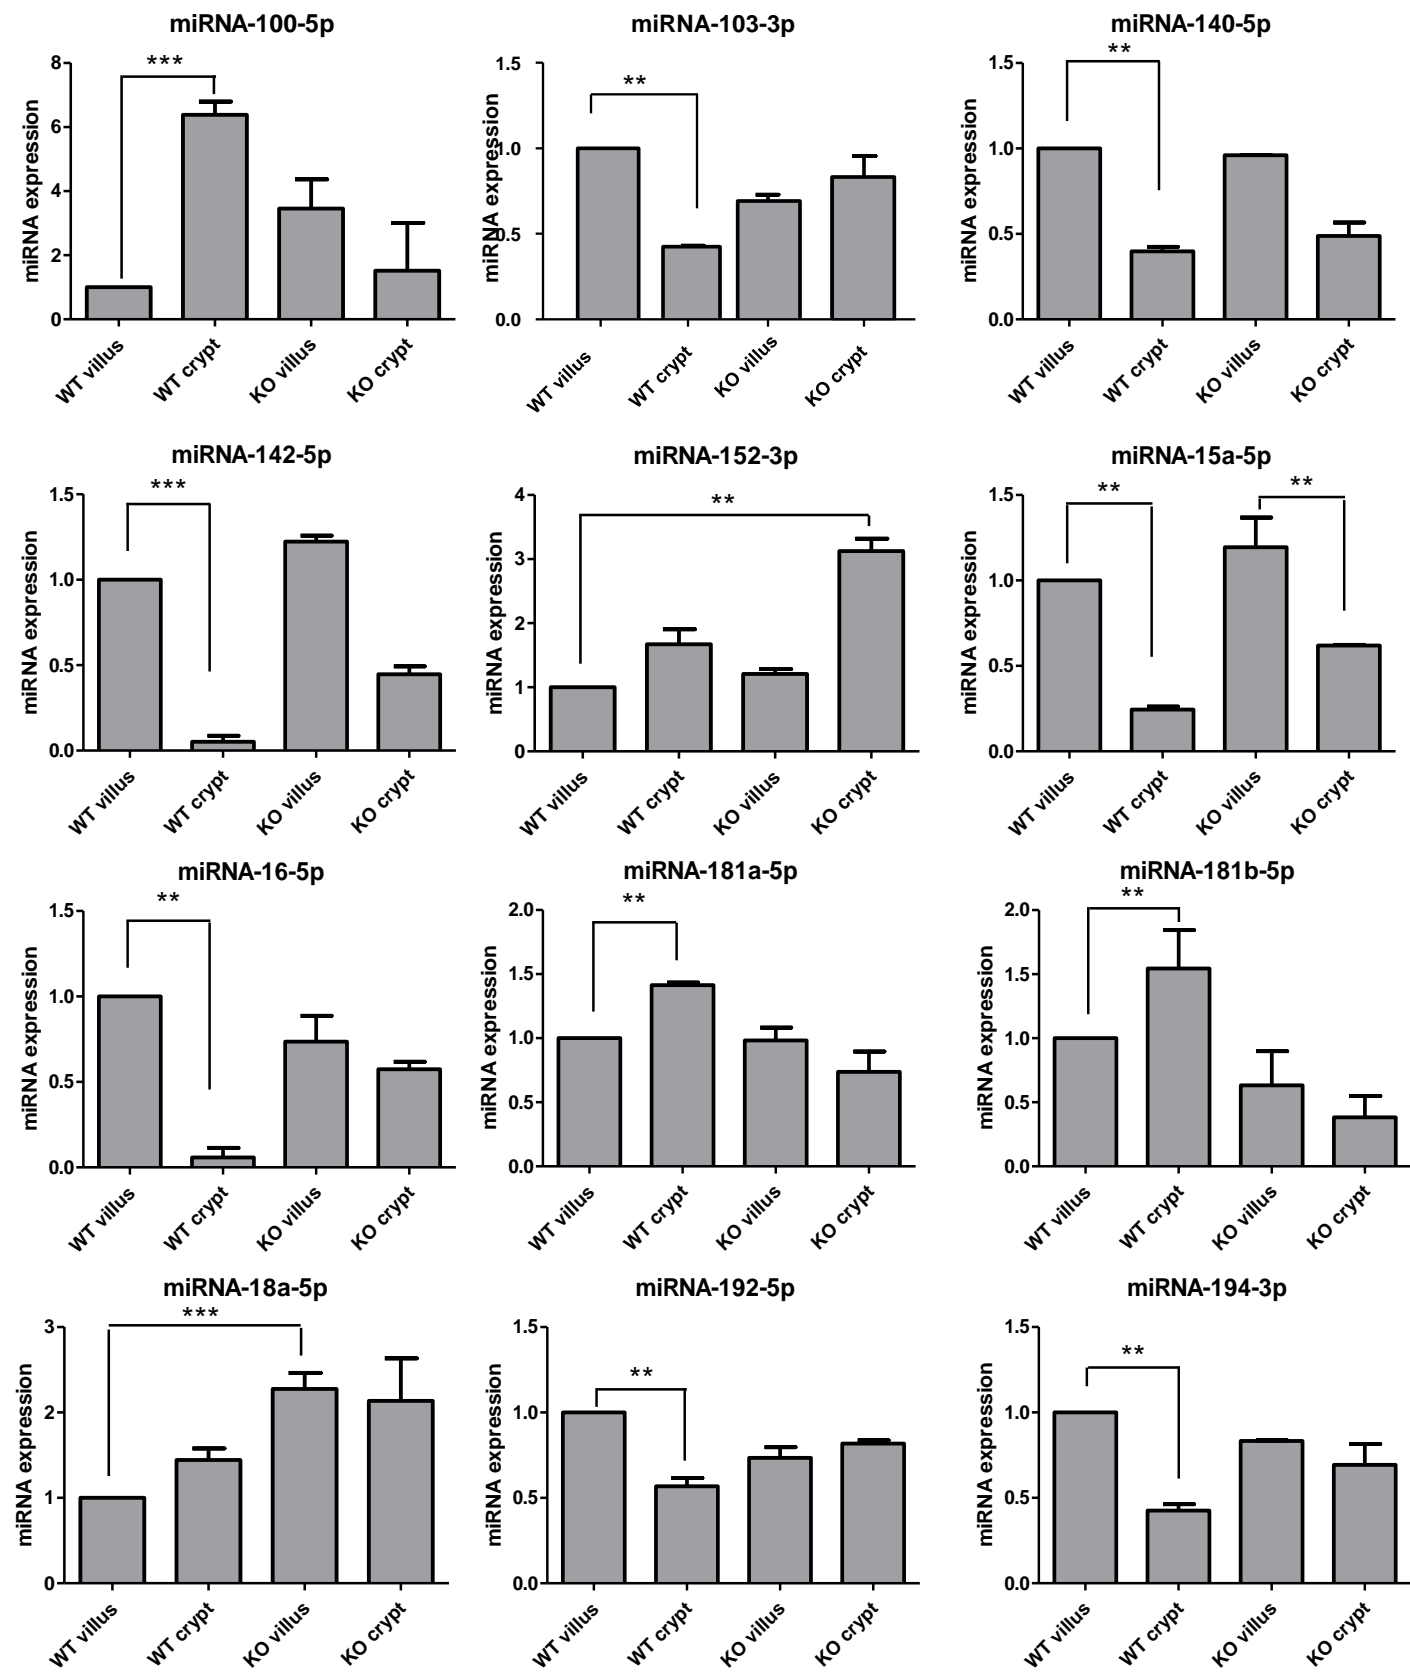

Supplementary Figure 4

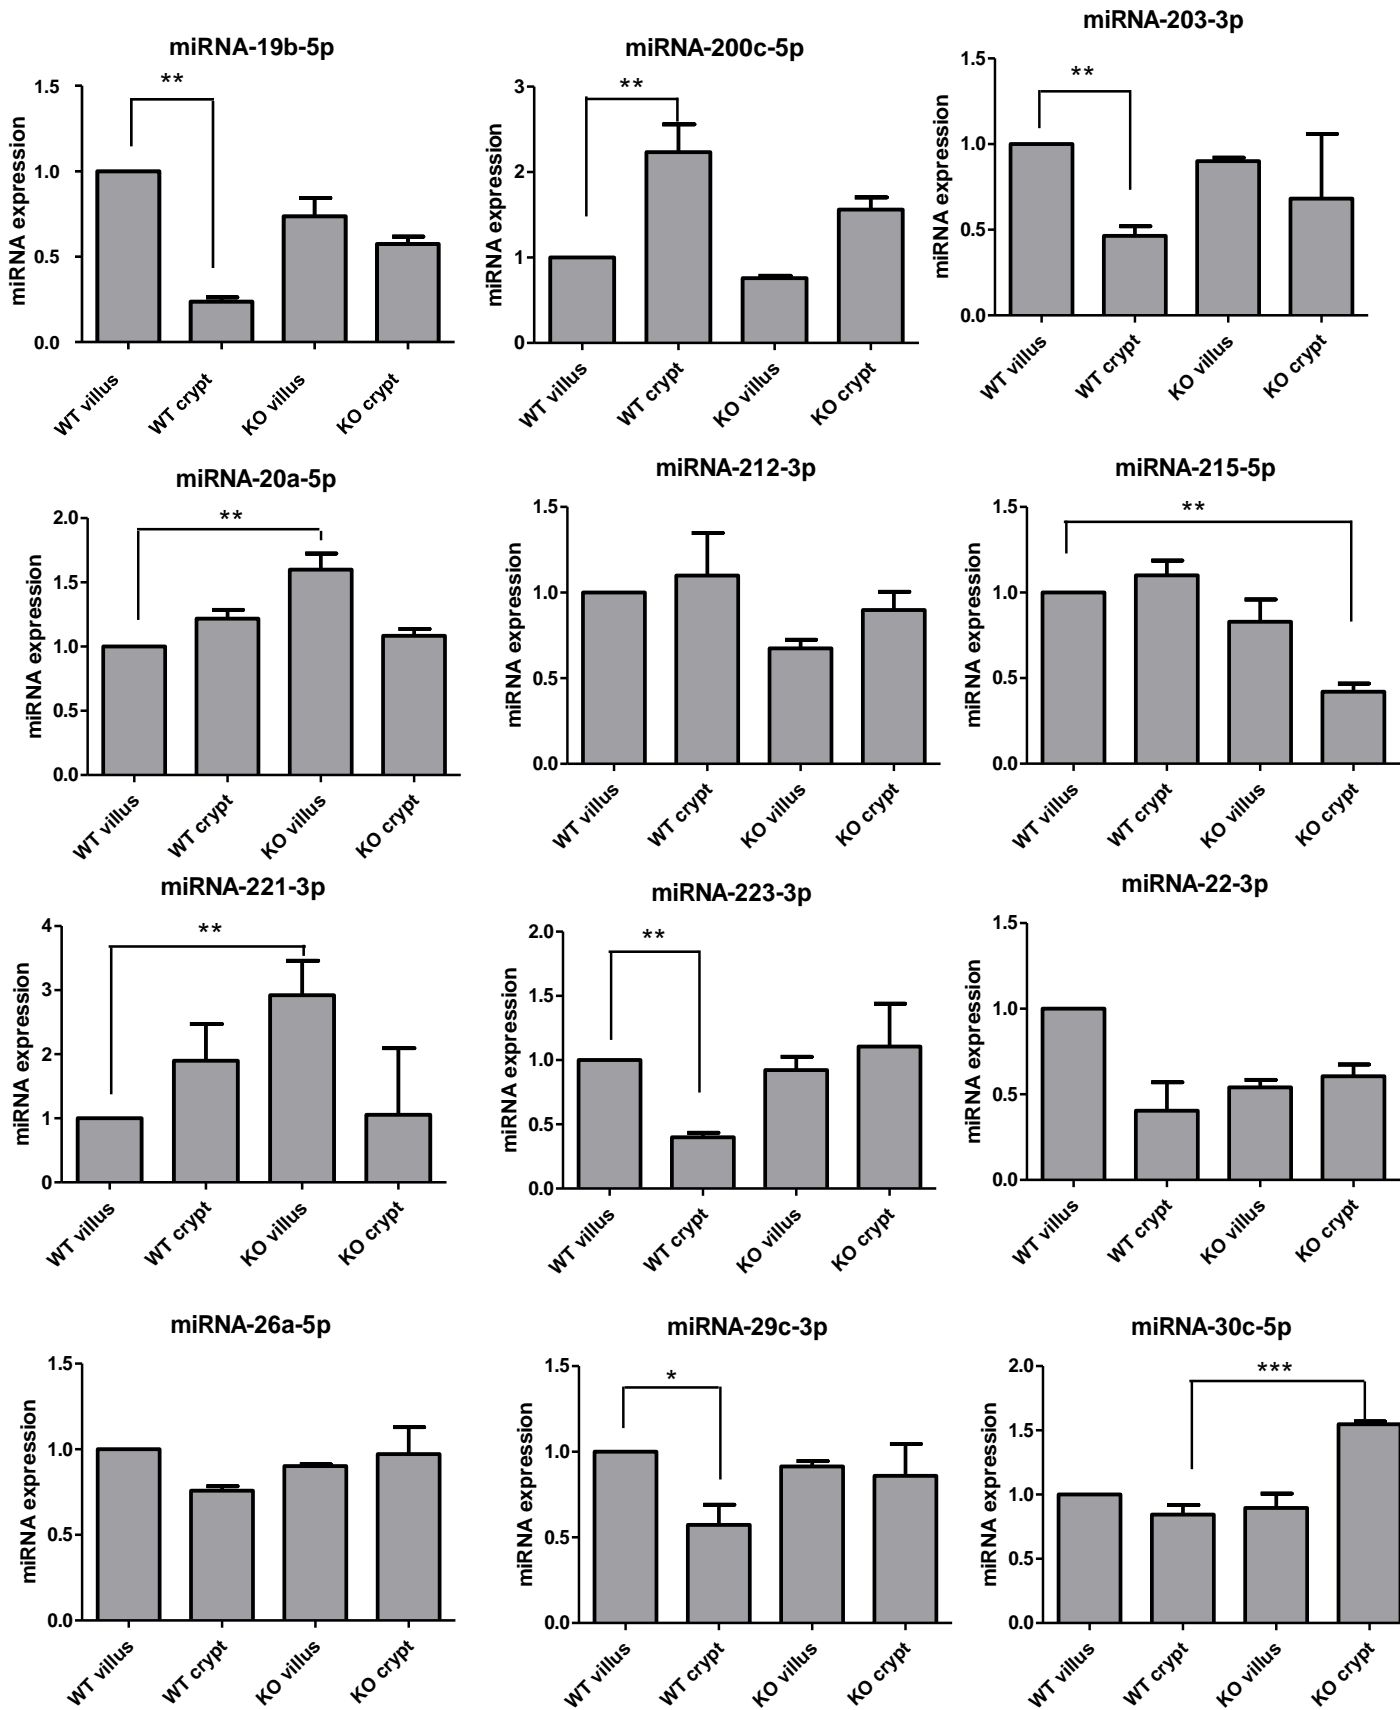

Supplementary Figure 4



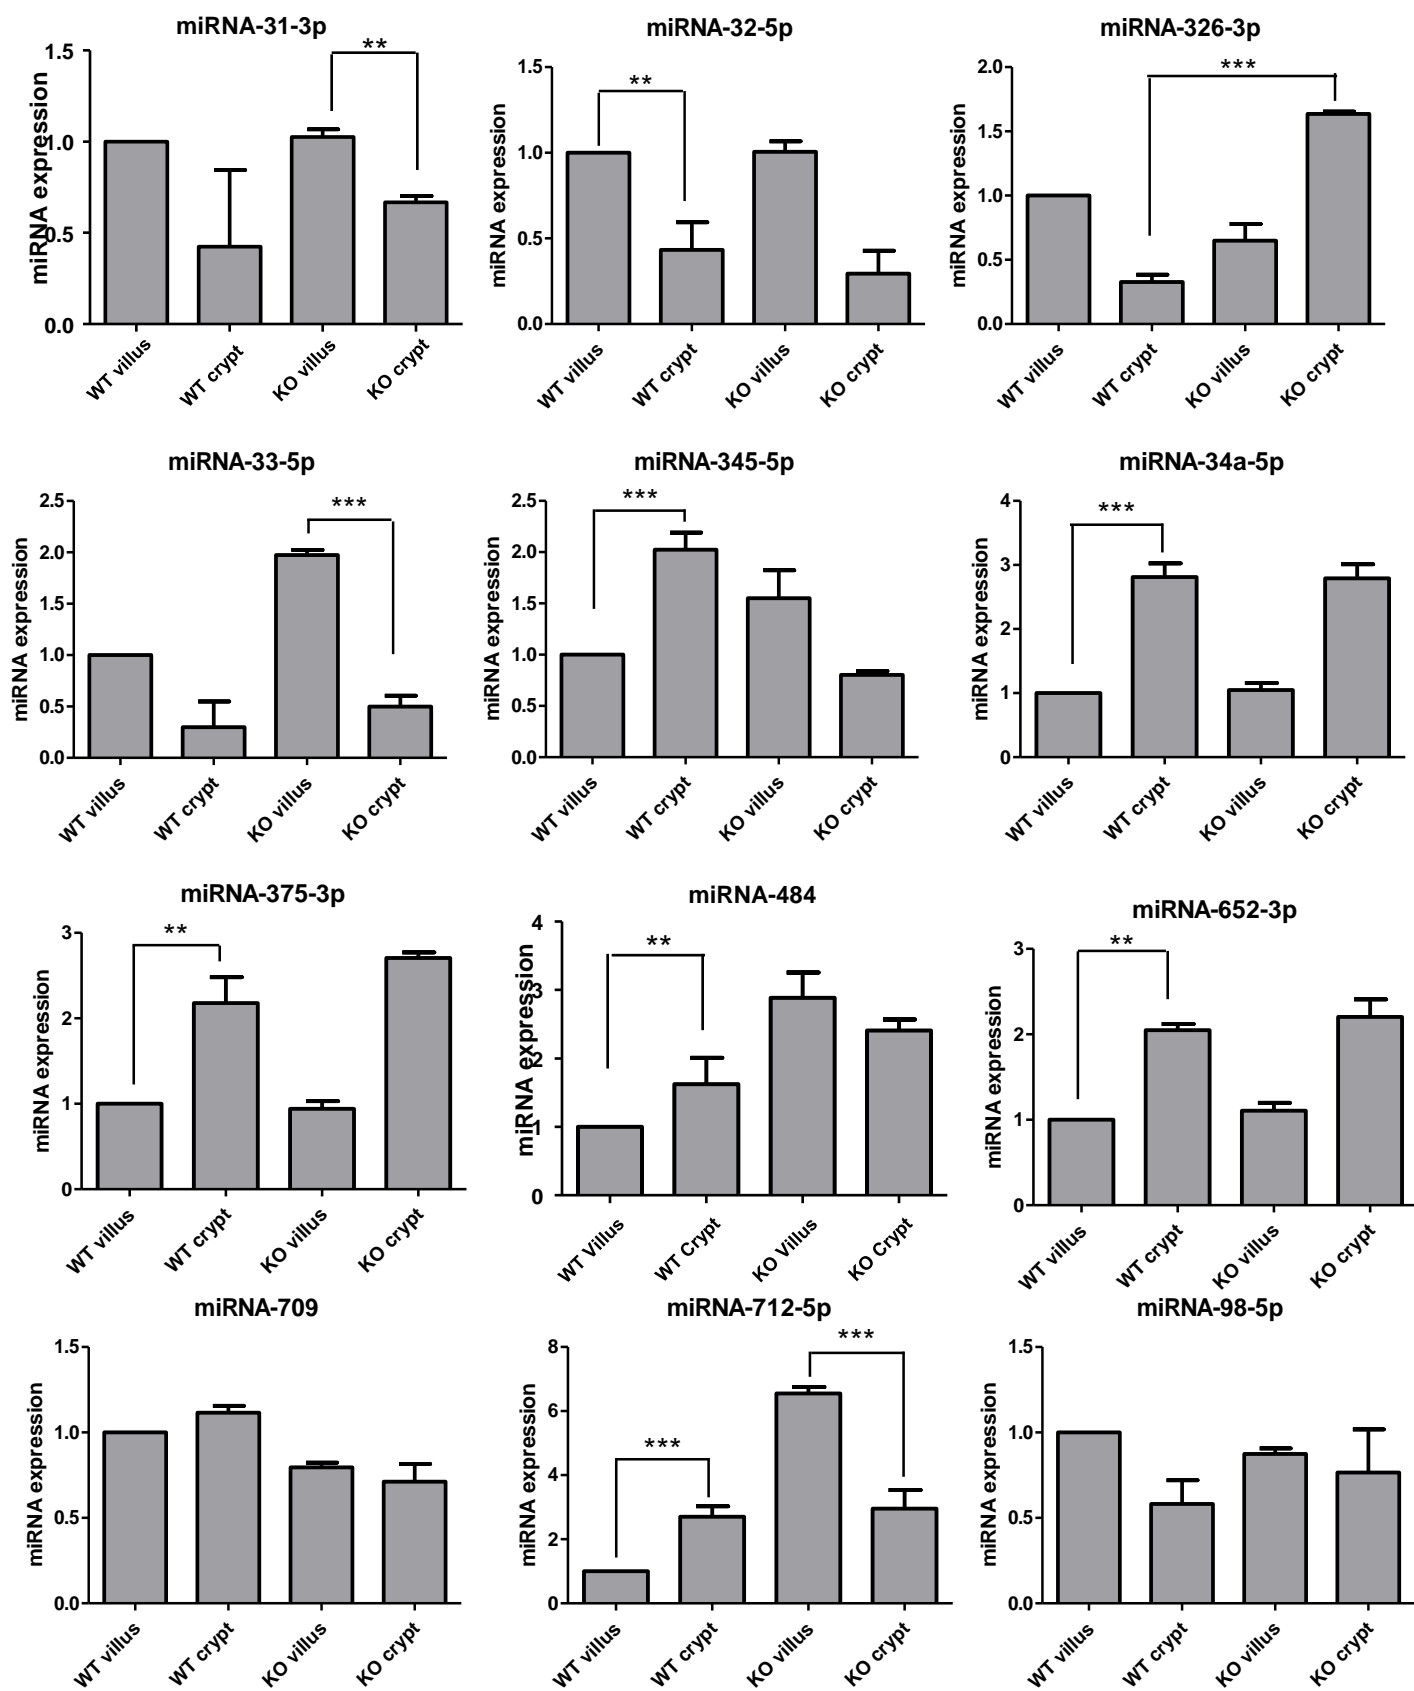

Supplementary Figure 4

**a**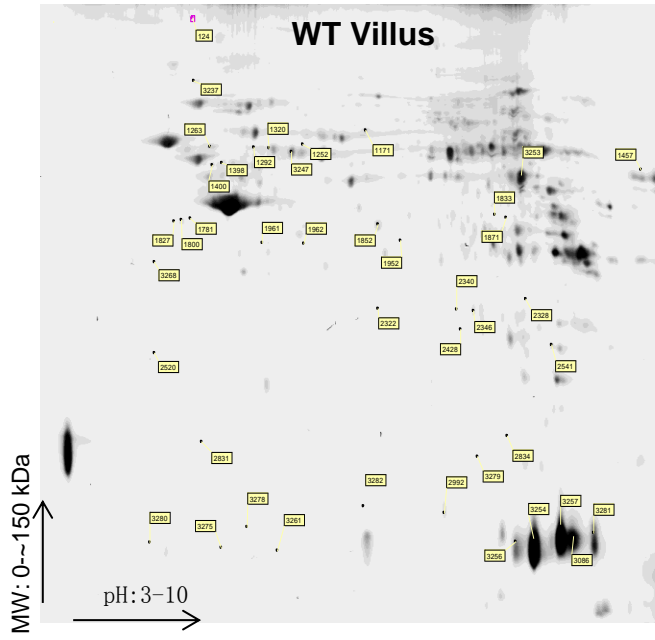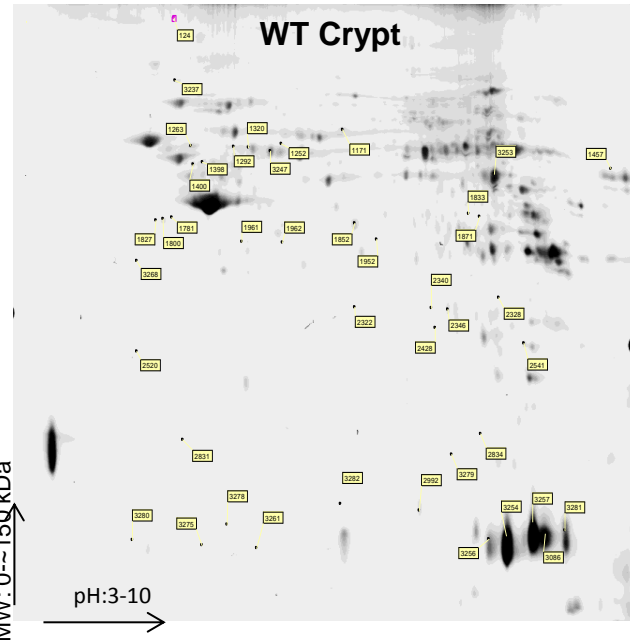**b**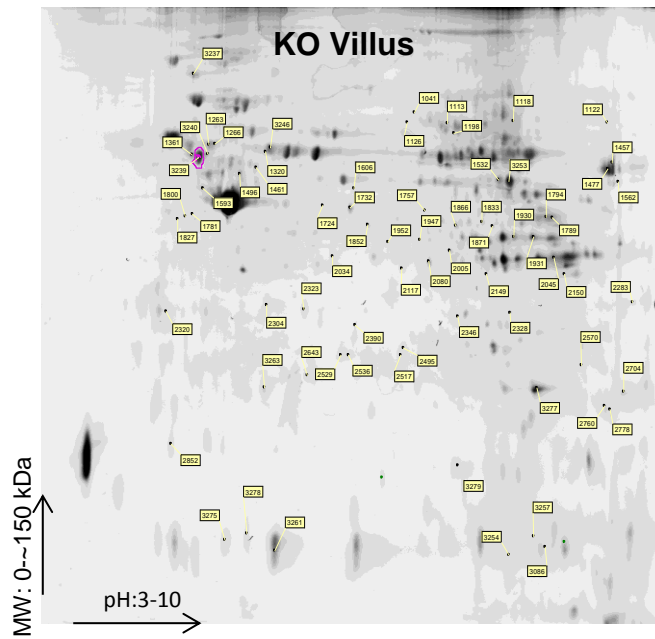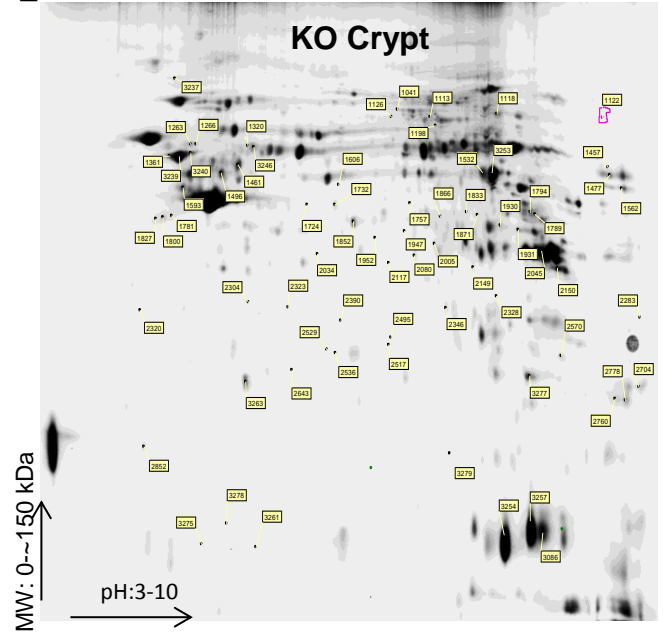

**a**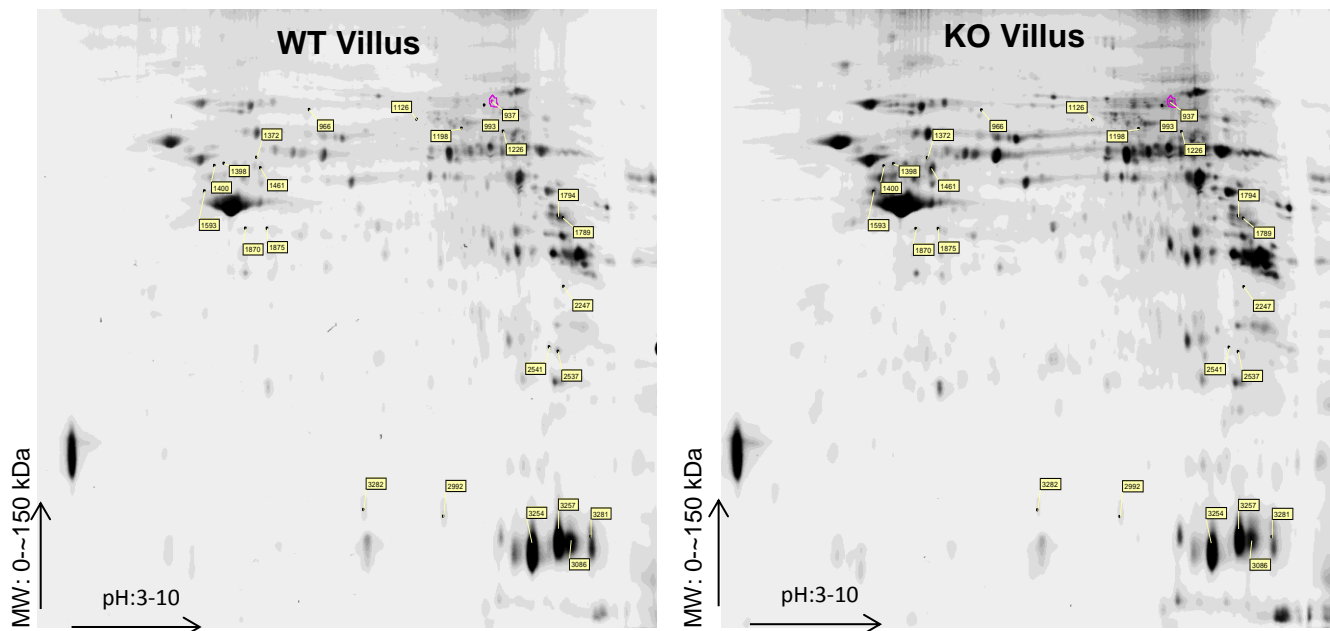**b**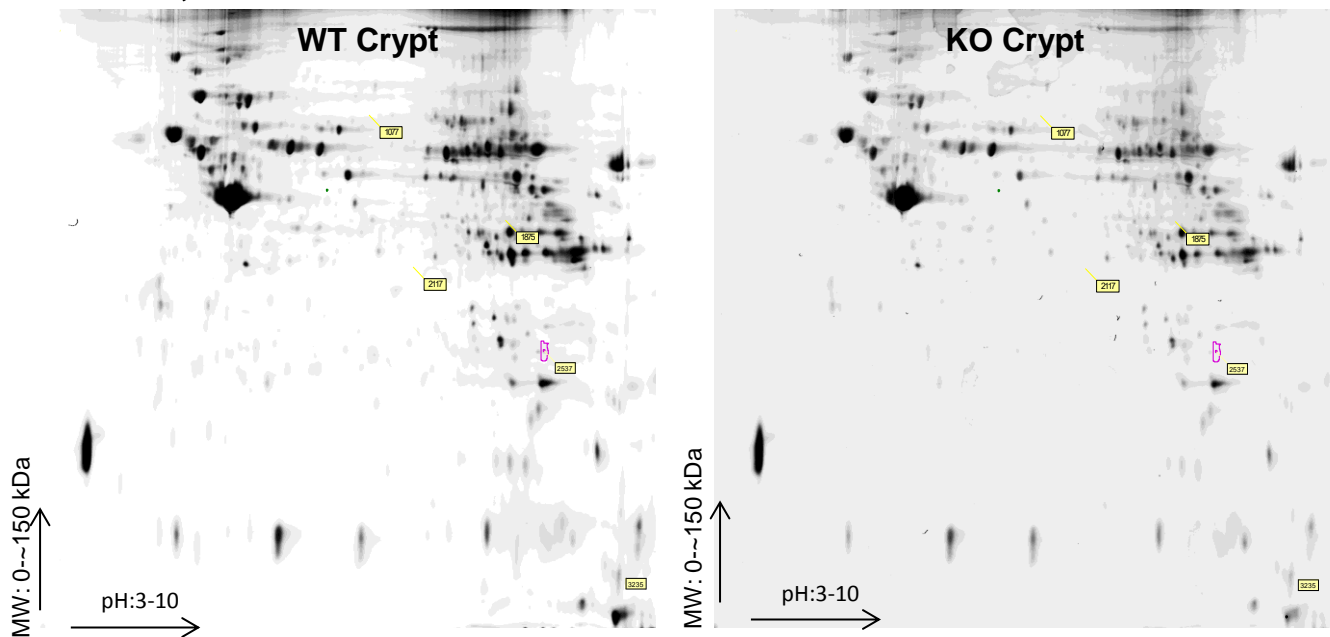

**Supplementary Table 1. List of primers used in this study**

| Primer           | Sequences                    |
|------------------|------------------------------|
| 36B4 F           | TCCAGGCTTTGGGCATCA           |
| 36B4 R           | CTTTATCAGCTGCACATCACTCAGA    |
| mPepT1 F         | CTCCATCTTCTACCTGTCCATCAACGCA |
| mPepT1 R         | GCTACGGTTCCTGAAGCGGTTTTTACT  |
| mmu-miR-142-5p F | CATAAAGTAGAAAGCACTACT        |
| mmu-miR-16-5p F  | TAGCAGCACGTAAATATTGGCG       |
| mmu-miR-22-3p F  | AAGCTGCCAGTTGAAGAACTGT       |
| mmu-miR-194-3p F | CCAGTGGGGCTGCTGTTATCTG       |
| mmu-miR-33-5p F  | GTGCATTGTAGTTGCATTGCA        |
| mmu-miR-223-3p F | TGTCAGTTTGTCAAATACCCCA       |
| mmu-miR-32-5p F  | TATTGCACATTACTAAGTTGCA       |
| mmu-miR-140-5p F | CAGTGGTTTTACCTATGGTAG        |
| mmu-miR-15a-5p F | TAGCAGCACATAATGGTTTGTG       |
| mmu-miR-31-3p F  | TGCTATGCCAACATATTGCCATC      |
| mmu-miR-326-3p F | CCTCTGGGCCCTTCCTCCAGT        |
| mmu-miR-29c-3p F | TAGCACCATTTGAAATCGGTTA       |

|                   |                         |
|-------------------|-------------------------|
| mmu-miR-203-3p F  | GTGAAATGTTTAGGACCACTAG  |
| mmu-miR-19b-5p F  | AGTTTTGCAGGTTTGCATCCAGC |
| mmu-miR-26a-5p F  | TTCAAGTAATCCAGGATAGGCT  |
| mmu-miR-103-3p F  | AGCAGCATTGTACAGGGCTATGA |
| mmu-miR-192-5p F  | CTGACCTATGAATTGACAGCC   |
| mmu-miR-98-5p F   | TGAGGTAGTAAGTTGTATTGTT  |
| mmu-miR-30c-5p F  | TGTAAACATCCTACACTCTCAGC |
| mmu-miR-215-5p F  | ATGACCTATGATTTGACAGAC   |
| mmu-miR-212-3p F  | TAACAGTCTCCAGTCACGGCCA  |
| mmu-miR-221-3p F  | AGCTACATTGTCTGCTGGGTTTC |
| mmu-miR-20a-5p F  | TAAAGTGCTTATAGTGCAGGTAG |
| mmu-miR-181a-5p F | AACATTCAACGCTGTCGGTGAGT |
| mmu-miR-709 F     | GGAGGCAGAGGCAGGAGGA     |
| mmu-miR-484 F     | TCAGGCTCAGTCCCCTCCCGAT  |
| mmu-miR-18a-5p F  | TAAGGTGCATCTAGTGCAGATAG |
| mmu-miR-181b-5p F | AACATTCATTGCTGTCGGTGGGT |
| mmu-miR-652-3p F  | AATGGCGCCACTAGGGTTGTG   |
| mmu-miR-34a-5p F  | TGGCAGTGTCTTAGCTGGTTGT  |

|                   |                          |
|-------------------|--------------------------|
| mmu-miR-200c-5p F | CGTCTTACCCAGCAGTGTTTGG   |
| mmu-miR-375-3p F  | TTTGTTTCGTTCCGGCTCGCGTGA |
| mmu-miR-712-5p F  | CTCCTTCACCCGGGCGGTACC    |
| mmu-miR-345-5p F  | GCTGACCCCTAGTCCAGTGCTT   |
| mmu-miR-152-3p F  | TCAGTGCATGACAGAACTTGG    |
| mmu-miR-100-5p F  | AACCCGTAGATCCGAACTTGTG   |
| Muc2 F            | GACCTGACAATGTGCCCAGA     |
| Muc2 R            | GGCAAACACAGTCCTTGCAG     |
| Lgr5 F            | CTGCCCATCACACTGTCACT     |
| Lgr5 R            | GCAGAGGCGATGTAGGAGAC     |
